# Supplementary material for: Disruption of lysosomal proteolysis in astrocytes facilitates midbrain organoid proteostasis failure in an early-onset Parkinson’s disease model
Source: PubMed Central journal article supplement (PMC10781970; doi:10.1038/s41467-024-44732-2), 2024-01-10
Supplement: 41467_2024_44732_MOESM2_ESM.pdf [file 41467_2024_44732_MOESM2_ESM.pdf]

## **Description of Additional Supplementary Files**

**File Name:** Supplementary Data 1

**Description:** Pathway analysis of the proteomics datasets.
