# Supplementary material for: Disruption of lysosomal proteolysis in astrocytes facilitates midbrain organoid proteostasis failure in an early-onset Parkinson’s disease model
Source: Nat Commun. 2024 Jan 10;15:447. doi: 10.1038/s41467-024-44732-2 (PMC10781970; doi:10.1038/s41467-024-44732-2)
Supplement: Supplementary file 1 — Supplementary Information [file 41467_2024_44732_MOESM1_ESM.pdf]

# Disruption of lysosomal proteolysis in astrocytes facilitates midbrain organoid proteostasis failure in an early-onset PD model

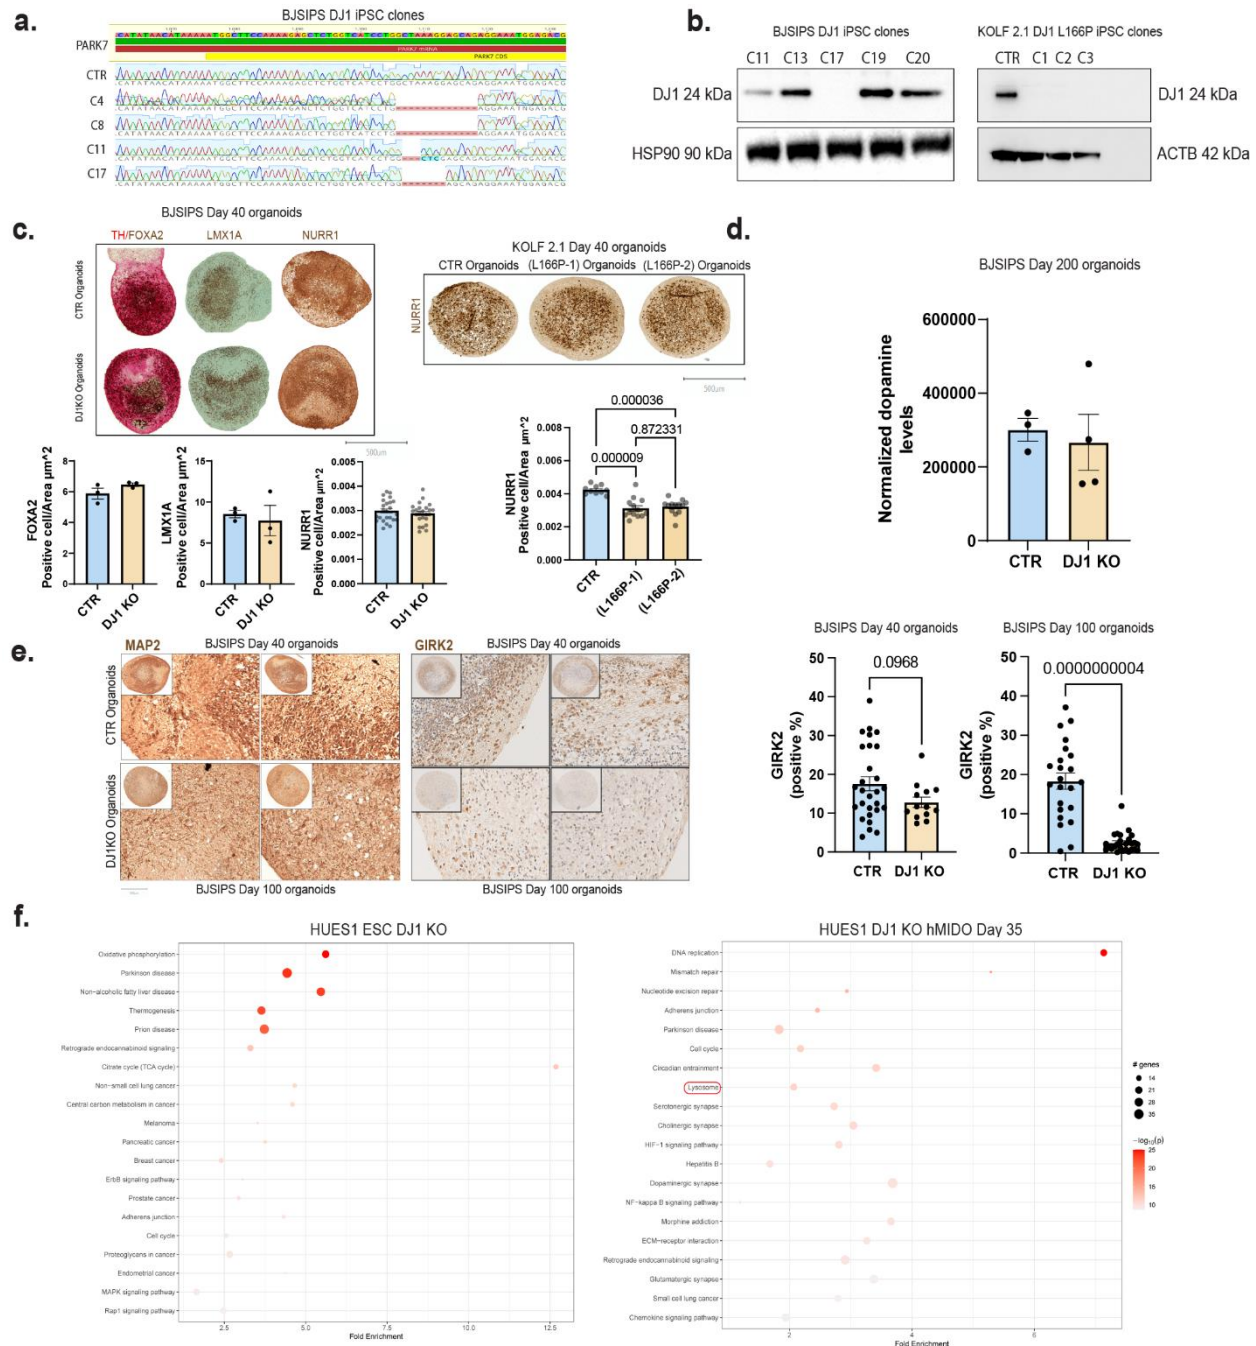

**Figure S1. iPSC and midbrain organoid quality controls and validation.** a. Representation of the Sanger sequencing chromatogram for DJ1 CRISPR clones in BJ-SIPS iPSC line. b. KO confirmation immunoblot for DJ1 CRISPR clones in BJ-SIPS and KOLF 2.1J iPSC lines. c.

Midbrain organoids staining and quantification of TH/FOXA2 ( $n = 3$ , Two-tailed t test was used for mean comparisons) and LMX1A ( $n = 3$ , Two-tailed t test was used for mean comparisons) markers at day 20 and NURR1 at day 40 positive cells for CTR and KO BJ-SIPS ( $n = 24$ , Two-tailed t test was used for mean comparisons) or KOLF 2.1J CTR ( $n = 10$ ), DJ1 L166P KO1 ( $n = 13$ ), and KO2 ( $n = 13$ , One-way ANOVA followed by Tukey's for the multiple comparisons test). d. Mass spectrometry dopamine quantification of midbrain organoids at day 200 (CTR,  $n = 3$  and DJ1 KO,  $n = 4$ ). e. Representative 40x images of hMIDO staining for MAP2 and GIRK2 at different time points and quantification of GIRK2 positive cells for day 40 ( $n = 3$ ) and day 100 organoids ( $n = 3$ , Two-tailed t-test was used for mean comparisons). f. Pathway enrichment analysis in DJ1 KO generated from HUES1 iPSC and day 35 midbrain organoids. All data are represented in mean  $\pm$  S.E.M, data points are individual organoids, and the p-value was reported on the graph highlighted comparison. All measurements were taken from distinct samples.

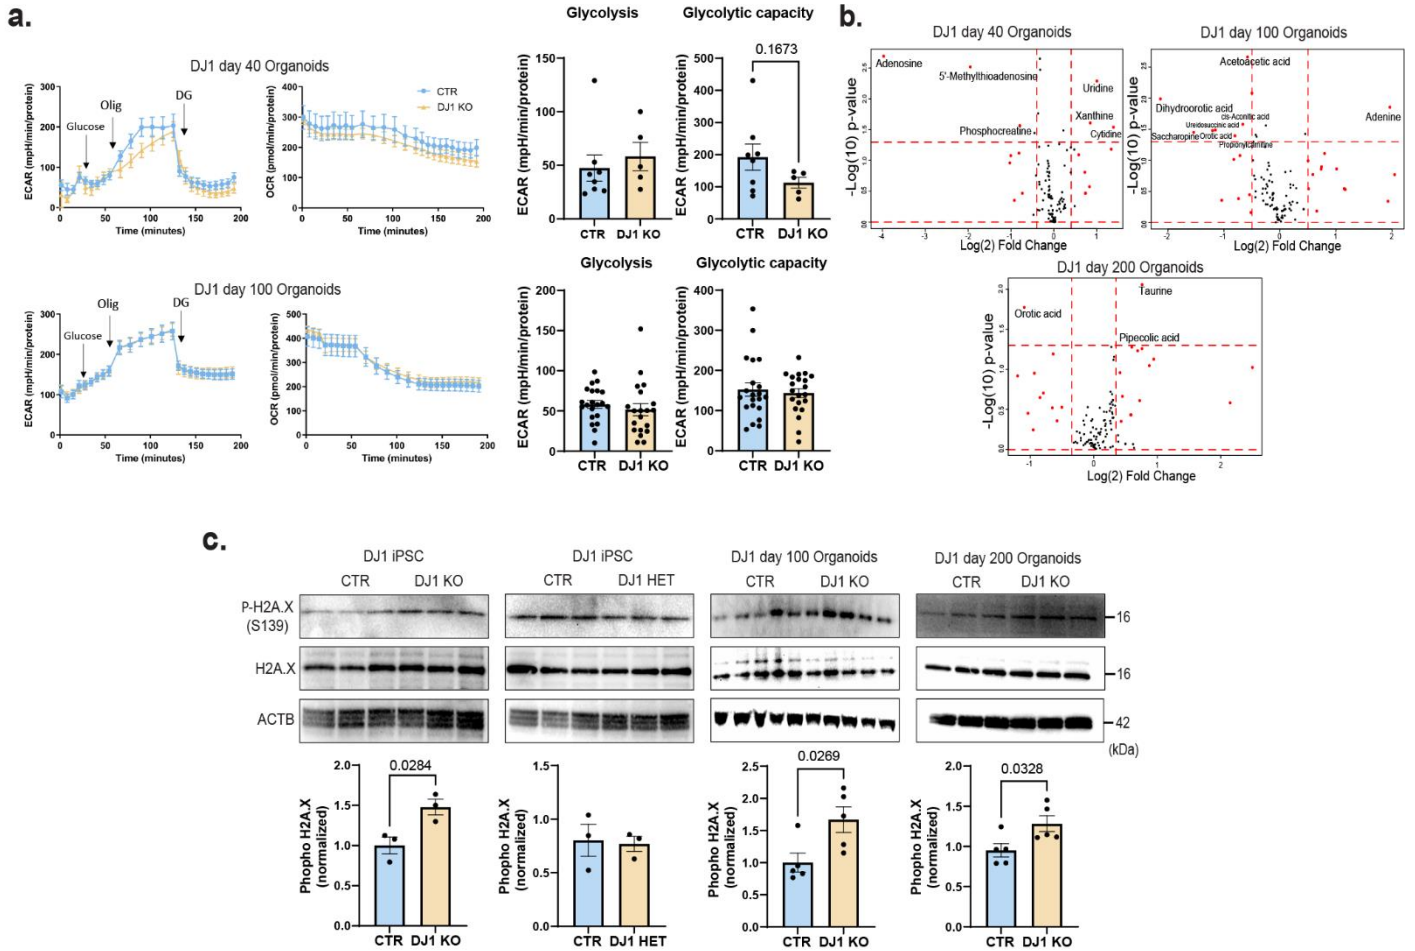

**Figure S2. Metabolic and DNA damage quantifications in midbrain organoids.** a. Glycolysis stress seahorse assay in day 40 (CTR,  $n = 8$  and DJ1 KO,  $n = 5$ , Two-tailed t-test was used for mean comparisons) and day 100 (CTR,  $n = 21$  and DJ1 KO,  $n = 20$ , Two-tailed t test was used for mean comparisons) midbrain organoids showing ECAR and OCR levels pre- glucose and after glucose, oligomycin, and DG treatments. b. Volcano plot representation of metabolomics panel for energy-related metabolites in day 40 ( $n = 6$ ), 100 ( $n = \text{CTR}, n = 3$  and DJ1 KO,  $n = 5$ ), and 200 (CTR,  $n = 5$  and DJ1 KO,  $n = 8$ ) midbrain organoids. c. Immunoblots for native H2AX, phospho-H2AX (S139), and actin (ACTB) loading control for CTR ( $n = 3$ ), DJ1 HET ( $n = 3$ ), DJ1 KO iPSC ( $n = 3$ ) and day 100 ( $n = 5$ ) and 200 ( $n = 5$ ) and respective CTR ( $n = 5$ ) midbrain organoids (Two-tailed t test was used for mean comparisons). All data are represented in mean  $\pm$  S.E.M, data points from seahorse assay are individual organoids, and data points for Wb are individual well differentiations. p-value was reported on the graph highlighted comparison. All measurements were taken from distinct samples.

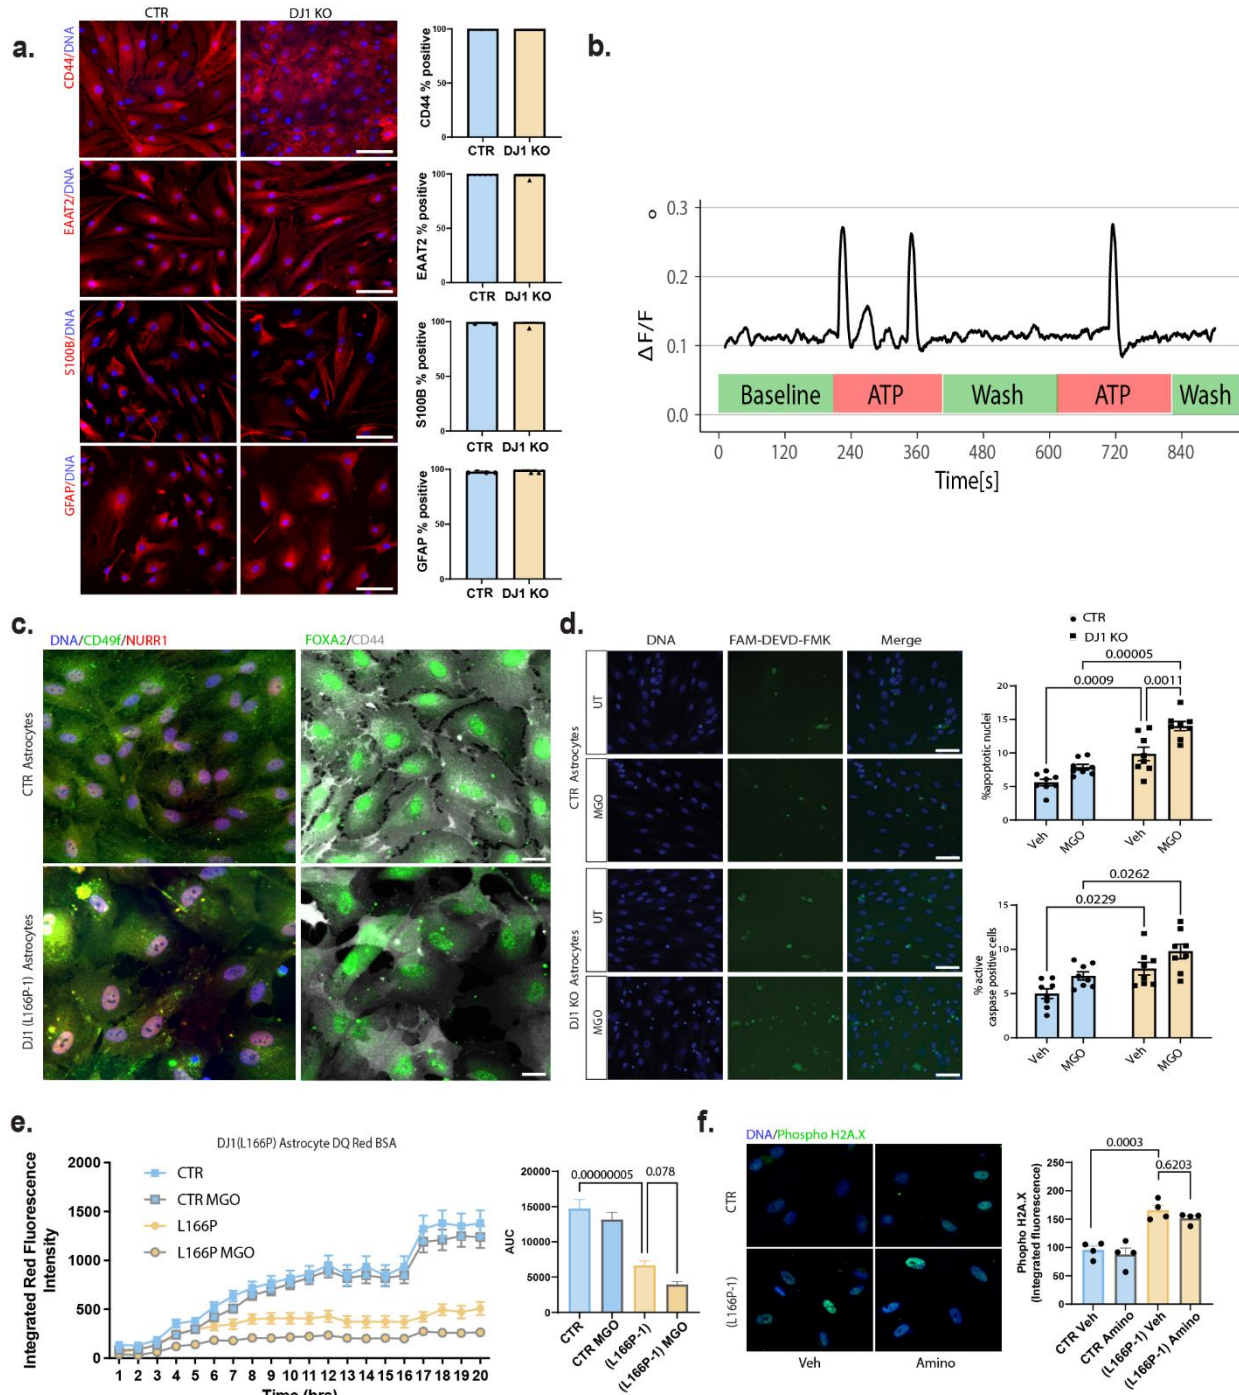

**Figure S3. Astrocyte markers and functional validation.** a. Immunostaining panel of CD44 (CTR,  $n = 8$ , DJ1 HET  $n = 12$  and, DJ1 KO,  $n = 12$ ), EAAT2 (CTR,  $n = 6$ , DJ1 HET  $n = 10$  and, DJ1 KO,  $n = 10$ ), S100B (CTR,  $n = 9$ , DJ1 HET  $n = 13$  and, DJ1 KO,  $n = 13$ ), and GFAP (CTR,  $n = 4$ , DJ1 HET  $n = 8$  and, DJ1 KO,  $n = 8$ ) counterstained with DAPI in midbrain astrocytes and % of positive cells (Two-tailed t test was used for mean comparisons). b. Astrocyte GCAMP8s calcium imaging  $\delta F/F$  trace before and after ATP stimulation. c. Immunostaining panel of midbrain

markers NUUR1 and FOXA2 co-stained with CD44. D. Poli-caspase reporter peptide FAM-DEVD-FMK staining in MGO treated or untreated CTR ( $n = 8$ ) or DJ1 KO ( $n = 8$ ) astrocytes counterstained with DAPI (Two-way ANOVA followed by Tukey's for the multiple comparisons test). d. Quantification of the standing showing percentage apoptotic nuclei and caspase-positive cells. e. DQBSA proteolysis live imaging assay of vehicle or MGO-treated astrocytes of CTR ( $n = 24$ ) or DJ1 L166P ( $n = 24$ , Two-way ANOVA followed by Tukey's for the multiple comparisons test) genotypes. f. Immunostaining for phospho H2A.X in Amino-treated astrocytes ( $n = 4$ , Two-way ANOVA followed by Tukey's for the multiple comparisons test). Scale bars, 100  $\mu\text{m}$  for A.; 20  $\mu\text{m}$  for C; 50  $\mu\text{m}$  for D. All data are represented in mean  $\pm$  S.E.M, data points are individual organoids, and the p-value was reported on the graph highlighted comparison. All measurements were taken from distinct samples.

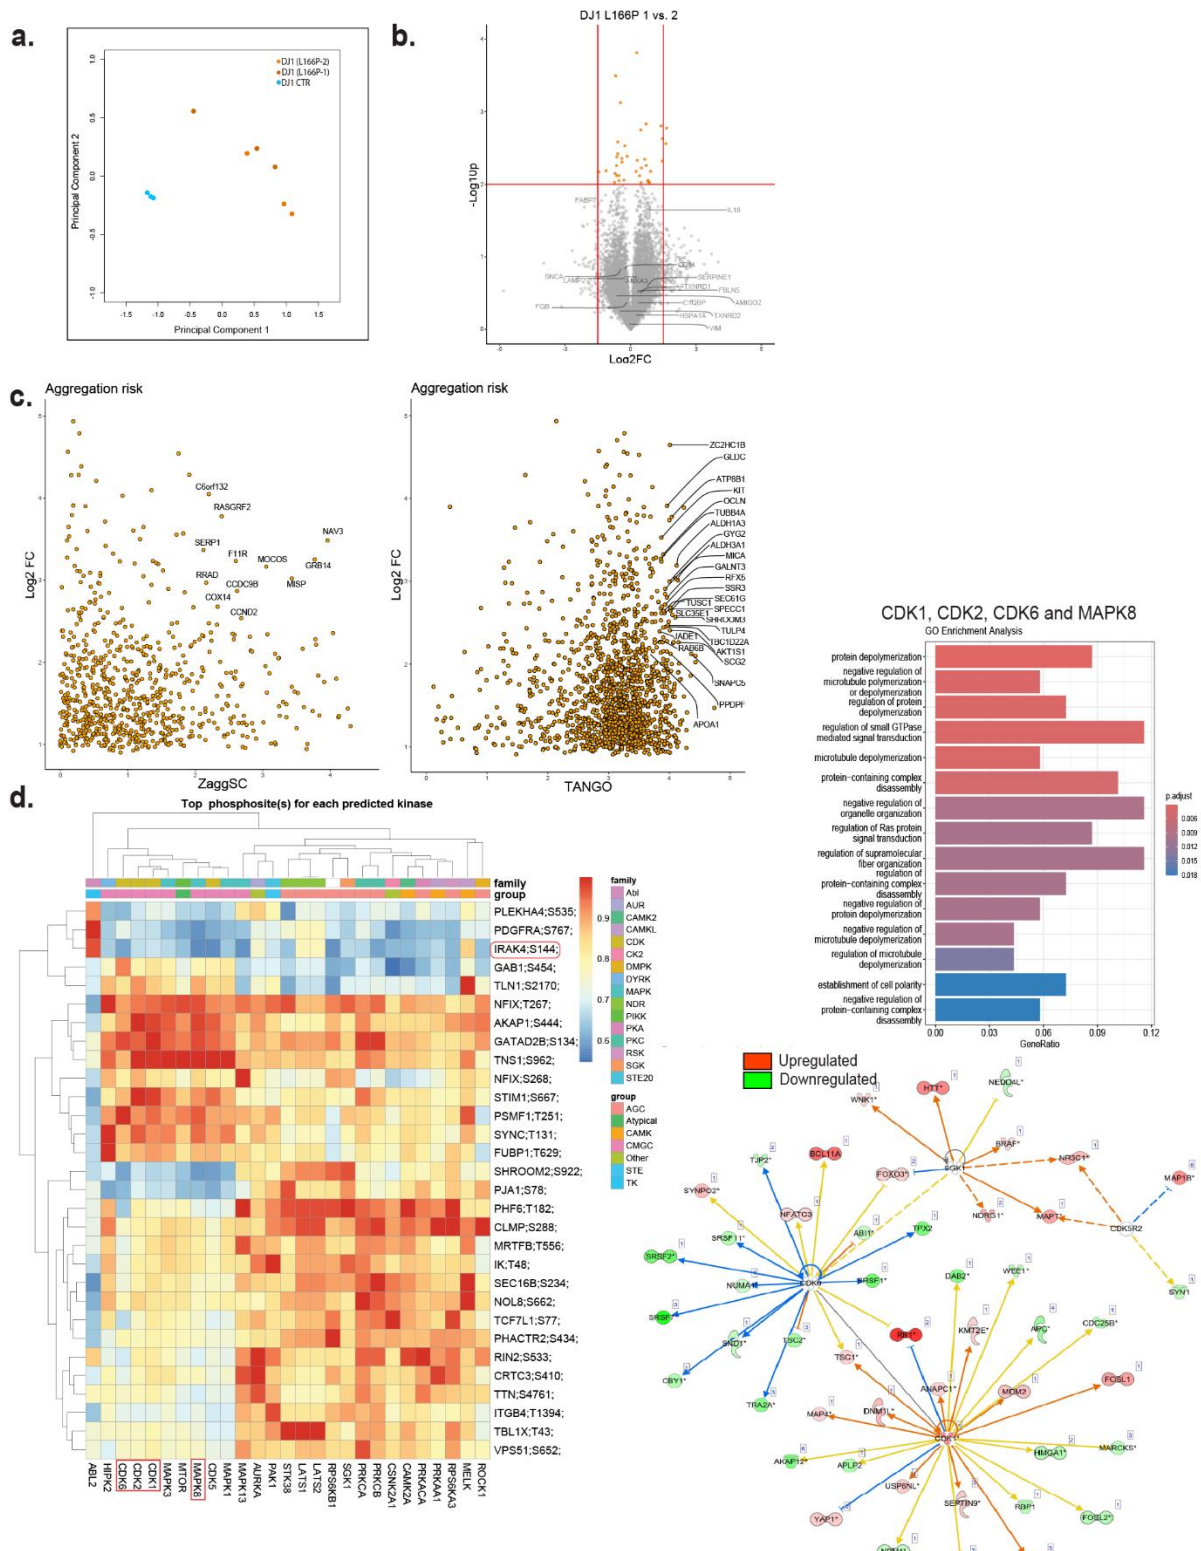

## Figure S4. Astrocyte proteomics quality control analysis and phosphoproteomics analysis

a. PCA analysis of the TMT-labelled proteomics in KOLF 2.1J CTR ( $n = 3$ ), L166P-1 ( $n = 3$ ), and L166P-2 ( $n = 3$ ) midbrain astrocytes (related to KN073-96 dataset). b. Volcano plot comparing the two DJ1 L166P clones highlighting selected proteins (related to KN073-96 dataset). c. Log2FC DJ1 L166P proteomics integration with aggregation risk scores for the human proteome ZaggSC and TANGO score showing selected proteins (related to KN073-96 dataset). d. Clustering plot of phospho-proteomics kinase activity prediction showing the top phosphosites, IPA Kinase/phosphosite network plots, and GO Enrichment analysis for CDK1, CDK2, CDK6, and MAPK8. All measurements were taken from distinct samples (related to KN043-066 and KN067-072 datasets).

a.

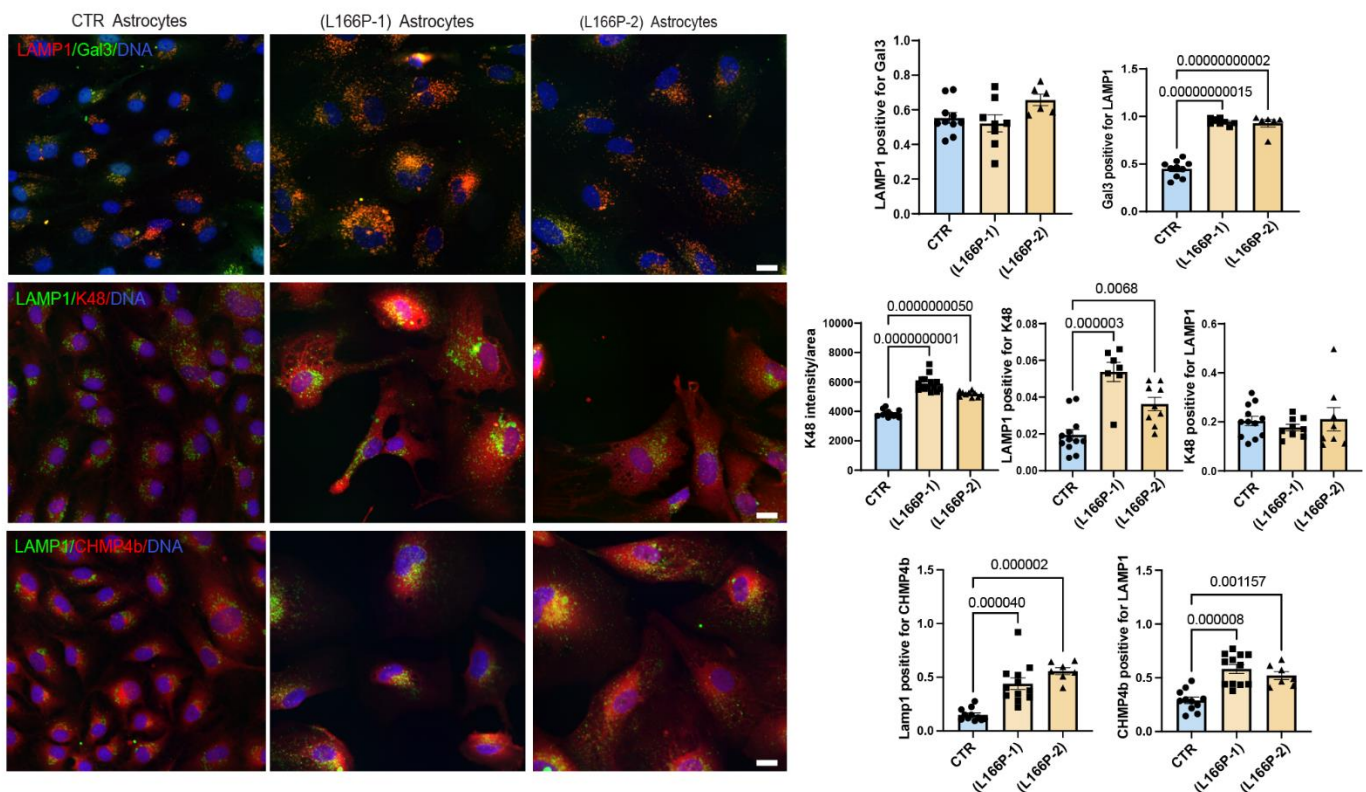

## Figure S5. Astrocyte DJ1 loss of function lysosome damage and repair analysis.

a. Immunostaining panel showing Gal3 co-stained with LAMP1 in KOLF 2.1J CTR, L166P-1, and L166P-2 midbrain astrocytes. Co-localization analysis of Gal3 co-stained with LAMP1 (CTR,  $n = 10$ , L166P-1  $n = 8$  and, L166P-2,  $n = 6$ , One-way ANOVA followed by Tukey's for the multiple comparisons test). Immunostaining panel showing K48 Ub chain co-stained with LAMP1 in KOLF 2.1J CTR, L166P-1, and L166P-2 midbrain astrocytes. Co-localization analysis of K48 Ub chain

co-stained with LAMP1 (CTR,  $n = 12$ , L166P-1  $n = 9$  and, L166P-2,  $n = 8$ , One-way ANOVA followed by Tukey's for the multiple comparisons test). Immunostaining panel showing CHMP4b co-stained with LAMP1 in KOLF 2.1J CTR, L166P-1, and L166P-2 midbrain astrocytes. Co-localization analysis of CHMP4b co-stained with LAMP1 (CTR,  $n = 11$ , L166P-1  $n = 12$  and, L166P-2,  $n = 7$ , One-way ANOVA followed by Tukey's for the multiple comparisons test). Scale bars, 15  $\mu\text{m}$ . All data are represented in mean  $\pm$  S.E.M, data points are individual wells, and the p-value was reported on the graph highlighted comparison. All measurements were taken from distinct samples.

| Case | Age | Sex | Clinical<br>Diagnosis                            | Neuropathological<br>Diagnosis |
|------|-----|-----|--------------------------------------------------|--------------------------------|
| 1    | 84  | M   | Parkinson's<br>disease                           | Parkinson's disease            |
| 2    | 69  | M   | Parkinson's<br>disease                           | Parkinson's disease            |
| 3    | 82  | M   | Parkinson's<br>disease                           | Parkinson's disease            |
| 4    | 88  | M   | Parkinson's<br>disease                           | Parkinson's disease            |
| 5    | 64  | M   | Parkinson's<br>disease                           | Parkinson's disease            |
| 6    | 77  | M   | Parkinson's<br>disease                           | Parkinson's disease            |
| 7    | 89  | M   | Pancreatic<br>cancer                             | Control                        |
| 8    | 65  | F   | ST-segment<br>elevation myocardial<br>infarction | Control                        |
| 9    | 82  | M   | Cholecystitis                                    | Control                        |
| 10   | 77  | F   | Diabetes                                         | Control                        |
| 11   | 65  | M   | Acute myeloid<br>leukemia                        | Control                        |
| Case | Age | Sex | Clinical<br>Diagnosis                            | Neuropathological<br>Diagnosis |

**Supplementary Table1.** Clinical information on the PD patients cohort.

| REAGENT or RESOURCE                                            | SOURCE             | IDENTIFIER                           |
|----------------------------------------------------------------|--------------------|--------------------------------------|
| Antibodies/<br>Concentration                                   |                    |                                      |
| Donkey anti-Mouse<br>IgG, Alexa Fluor 488 (1:300)              | Invitrogen         | Cat#A32766                           |
| Donkey anti-Mouse<br>IgG, Alexa Fluor 647 (1:300)              | Invitrogen         | Cat#A-31571                          |
| Donkey anti-Mouse<br>IgG, Alexa Fluor 555 (1:300)              | Invitrogen         | Cat#A-31570                          |
| Donkey anti-Rabbit<br>IgG, Alexa Fluor 488 (1:300)             | Invitrogen         | Cat#A-21206                          |
| Donkey anti-Rabbit<br>IgG, Alexa Fluor 647 (1:300)             | Invitrogen         | Cat#A-31573                          |
| Peroxidase AffiniPure<br>Goat Anti-Mouse IgG (H+L)<br>(1:5000) | Jackson Laboratory | Cat#115-035-166;<br>RRID: AB_2338511 |
| Peroxidase AffiniPure<br>Goat Anti-Mouse IgG (H+L)<br>(1:5000) | Jackson Laboratory | Cat#111-035-144;<br>RRID: AB_2307391 |
| FOXA2 (1:100)                                                  | Abcam              | Cat#Ab108422;<br>RRID: AB_11157157   |
| GAPDH (1:3000)                                                 | Abcam              | Cat#Ab9485;<br>RRID: AB_307275       |
| GFAP (1:100 IF,<br>1:1000 WB)                                  | Millipore          | Cat#MAB360;<br>RRID: AB_11212597     |
| GFAP (1:10 IHC)                                                | Roche              | Cat#MAB360;<br>RRID: N/A             |
| TH (1:100 IF, 1:2000<br>WB)                                    | Millipore          | Cat#MAB318;<br>RRID: AB_2201528      |
| TH (1:100 IF, 1:2000<br>WB)                                    | ABCAM              | Cat#ab112;RRID:<br>N/A               |

|                                                      |                |                                  |
|------------------------------------------------------|----------------|----------------------------------|
| FOXA2 (1:500)                                        | ABCAM          | Cat#ab40874;RRID:<br>N/A         |
| PARK7/DJ1 (1:2000)                                   | ABCAM          | Cat#ab169520;RRID<br>: N/A       |
| LMX1A (1:500)                                        | SIGMA          | Cat#HPA030088;RR<br>ID: N/A      |
| FOXA2 (1:500)                                        | ABCAM          | Cat#ab60721;RRID:<br>N/A         |
| alpha Synuclein<br>(1:1000)                          | ABCAM          | Cat#ab138501;RRID<br>:AB_2537217 |
| alpha Synuclein<br>(Phosphorylated S129)<br>(1:1000) | ABCAM          | Cat#ab168381;RRID<br>:AB_2728613 |
| alpha Synuclein<br>(Filament) (1:1000)               | ABCAM          | Cat#ab209538;RRID<br>:AB_2714215 |
| EAAT2 (1:100)                                        | ABCAM          | Cat#ab41621;RRID:<br>N/A         |
| LC3A/B (1:1000)                                      | Cell Signaling | Cat#4108S;RRID:<br>N/A           |
| RAGE (1:1000)                                        | ABCAM          | Cat#ab37647;RRID:<br>AB_777613   |
| Histone H2A.X<br>(1:1000)                            | Millipore      | Cat#07-627;<br>RRID:AB_2233033   |
| CD49f (1:50)                                         | Biolegend      | Cat#313602;RRID:A<br>B_345296    |
| Methylglyoxal (MGO)<br>(1:1000)                      | Cell Biolabs   | Cat#STA-011;RRID:<br>N/A         |
| S100 – Beta (1:1000)                                 | ABCAM          | Cat#ab52642;RRID:<br>AB_882426   |
| LAMP1 (1:1000 WB,<br>1:50 IF)                        | ABCAM          | Cat#ab25630;RRID:<br>AB_470708   |
| NR4A2 (NURR1)<br>(1:100 IF, 1:3000 IHC)              | SIGMA          | Cat#N6413;RRID:A<br>B_1841046    |

|                                                              |                              |                                  |
|--------------------------------------------------------------|------------------------------|----------------------------------|
| CHMP4B (1:100)                                               | ptglab                       | Cat#13683-1-AP;RRID: N/A         |
| Galectin-3 (Mac-2) (1:100)                                   | Biolegend                    | Cat#125401;RRID:AB_1134237       |
| CD44 (1:100)                                                 | ABCAM                        | Cat#ab157107;RRID:AB_2847859     |
| Ubiquitin (Lys48-Specific), clone Apu2 (1:100 IF, 1:1000 Wb) | Millipore                    | Cat#05-1307;RRID:AB_1587578      |
| Phospho-Histone H2A.X (Ser139), clone JBW301 (1:1000)        | Millipore                    | Cat#05-636;RRID:AB_309864        |
| oxDJ-1 (Cys106), clone M149 (1:400)                          | Millipore                    | Cat#MABN1773;RRID: N/A           |
| $\beta$ -Actin (C4) HRP (1:1000)                             | Santa Cruz                   | Cat#sc-47778;RRID:AB_2714189     |
| $\beta$ -Actin (AC-15) 1:5000)                               | Invitrogen                   | Cat#AM4302;RRID:AB_2536382       |
| P62 (1:1000)                                                 | Progen                       | Cat#GP62-C;RRID:AB_2687531       |
| GBA (1:1000)                                                 | Abnova                       | Cat#H00002629-M01;RRID:AB_464151 |
| EAAT2 (1:100)                                                | ABCAM                        | Cat#ab41621;RRID:AB_941782       |
| Chemicals, peptides, and recombinant proteins                |                              |                                  |
| Accutase® Cell Detachment Solution                           | Innovative Cell Technologies | Cat#AT104;RRID: AB_2869384       |
| B-27™ Supplement (50×), Minus Vitamin A                      | Gibco                        | Cat#12587010;RRID: N/A           |
| Bovine Albumin Fraction V (7.5% Solution)                    | Gibco                        | Cat#15260037;RRID: N/A           |

|                                                                                             |                   |                             |
|---------------------------------------------------------------------------------------------|-------------------|-----------------------------|
| CHIR99021                                                                                   | Tocris            | Cat#4423; RRID:<br>N/A      |
| DAPT                                                                                        | Cayman Chemical   | Cat#13197; RRID:<br>N/A     |
| DB-cAMP/Dibutryl-<br>cAMP                                                                   | Biolog            | Cat#D 009; RRID:<br>N/A     |
| DirectPCR Lysis<br>Reagent (Cell)                                                           | Viagen Biotech    | Cat#302-C; RRID:<br>N/A     |
| DMEM/F-12,<br>GlutaMAX™ Supplement                                                          | Gibco             | Cat#10565018;<br>RRID: N/A  |
| Astrocyte Medium                                                                            | Sciencell         | Cat#1801; RRID:<br>N/A      |
| DMEM, High Glucose                                                                          | Gibco             | Cat#11965092;<br>RRID: N/A  |
| Geltrex™ LDEV-Free,<br>hESC-Qualified, Reduced<br>Growth Factor Basement<br>Membrane Matrix | Gibco             | Cat#A1413302;<br>RRID: N/A  |
| Hoechst 33342,<br>Trihydrochloride, Trihydrate -<br>10 mg/mL Solution in Water              | Invitrogen        | Cat#H3570; RRID:<br>N/A     |
| Laminin Mouse<br>Protein, Natural                                                           | Gibco             | Cat#23017015;<br>RRID: N/A  |
| L-Ascorbic Acid<br>(White Crystalline Powder)                                               | Fisher Scientific | Cat#BP351-500;<br>RRID: N/A |
| LDN193189                                                                                   | Stemgent          | Cat#04-0074; RRID:<br>N/A   |
| Leibovitz's L-15<br>Medium                                                                  | Gibco             | Cat#11415064;<br>RRID: N/A  |
| N-2 Supplement<br>(100x)                                                                    | Gibco             | Cat#17502048;<br>RRID: N/A  |
| Opti-MEM™ I<br>Reduced Serum Medium                                                         | Gibco             | Cat#31985062;<br>RRID: N/A  |

|                                                           |                          |                              |
|-----------------------------------------------------------|--------------------------|------------------------------|
| PBS, pH 7.4 (-CaCl <sub>2</sub> ,<br>-MgCl <sub>2</sub> ) | Gibco                    | Cat#10010023;<br>RRID: N/A   |
| Penicillin-<br>Streptomycin (10,000 U/mL)                 | Gibco                    | Cat#15140122;<br>RRID: N/A   |
| Poly-L-Ornithine<br>Hydrobromide                          | Sigma-Aldrich            | Cat#P3655; RRID:<br>N/A      |
| Proteinase K Solution<br>(20 mg/mL)                       | Viagen Biotech           | Cat#501-PK; RRID:<br>N/A     |
| Purmorphamine                                             | STEMCELL<br>Technologies | Cat#72204; RRID:<br>N/A      |
| Puromycin<br>Dihydrochloride                              | Gibco                    | Cat#A1113803;<br>RRID: N/A   |
| Recombinant Human<br>BDNF Protein                         | R&D Systems              | Cat#248-BD; RRID:<br>N/A     |
| Recombinant Human<br>CNTF Protein                         | Peprtech                 | Cat#450-13;RRID:<br>N/A      |
| Recombinant Human<br>GDNF Protein                         | R&D Systems              | Cat#212-GD; RRID:<br>N/A     |
| SAG                                                       | Cayman Chemical          | Cat#11914; RRID:<br>N/A      |
| SB431542                                                  | Stemgent                 | Cat#04-0010-10;<br>RRID: N/A |
| StemFlex™ Medium                                          | Gibco                    | Cat#A3349401;<br>RRID: N/A   |
| Thiazovivin                                               | Selleck Chemicals        | Cat#S1459; RRID:<br>N/A      |
| Trypan Blue Solution,<br>0.4%                             | Gibco                    | Cat#15250061;<br>RRID: N/A   |
| Aminoguanidine<br>hydrochloride                           | Sigma                    | Cat#1937-19-5;<br>RRID: N/A  |
| Bafilomycin A1 from<br>Streptomyces griseus               | Sigma                    | Cat#B1793; RRID:<br>N/A      |

|                                                                                       |                    |                                   |
|---------------------------------------------------------------------------------------|--------------------|-----------------------------------|
| (R)-MG-132                                                                            | Selleck Chemicals  | Cat#S2619; RRID:<br>N/A           |
| Non-essential Amino<br>Acids (NEAA)                                                   | Gibco              | Cat#11140050;RRID<br>: N/A        |
| GlutaMax Supplement                                                                   | Gibco              | Cat#35050061;RRID<br>: N/A        |
| Triton X-100                                                                          | Sigma              | Cat# T9284;RRID:<br>N/A           |
| RIPA buffer                                                                           | Sigma              | Cat# R0278;RRID:<br>N/A           |
| DQ™ Red BSA                                                                           | ThermoFisher       | Cat#D12051;RRID:<br>N/A           |
| Y-27632<br>Dihydrochloride                                                            | Tocris             | Cat#1254; RRID:<br>N/A            |
| Critical commercial<br>assays                                                         |                    |                                   |
| Seahorse XF<br>Glycolysis Stress Test Kit                                             | Agilent            | Cat#103020-<br>100;RRID: N/A      |
| Image-iT™ LIVE Red<br>and Green Caspase<br>Apoptosis Detection Kits for<br>microscopy | ThermoFisher       | Cat#I35101;RRID:<br>N/A           |
| Lipofectamine™ Stem<br>Transfection Reagent                                           | Invitrogen         | Cat#STEM00003;<br>RRID: N/A       |
| PROTEOSTAT                                                                            | Enzo               | Cat#ENZ-<br>51023;RRID: N/A       |
| P3 Primary Cell 4D-<br>Nucleofector™ X Kit S                                          | Lonza              | Cat#V4XP-3032;<br>RRID: N/A       |
| Experimental models:<br>Cell lines                                                    |                    |                                   |
| Human: BJ SiPS-D<br>induced pluripotent stem cells                                    | Harvard University | Cat#BJ SiPS-D:<br>RRID: CVCL_X741 |
| KOLF2.1J                                                                              | Jackson Laboratory | RRID: N/A                         |

|                                                                   |                                  |                          |
|-------------------------------------------------------------------|----------------------------------|--------------------------|
| KOLF2.1J DJ1 L166P<br>1                                           | Jackson Laboratory               | RRID: N/A                |
| KOLF2.1J DJ1 L166P<br>2                                           | Jackson Laboratory               | RRID: N/A                |
| Human: BJ SiPS-D<br>induced pluripotent stem cells<br>Dj1 HET #11 | This paper                       | RRID: N/A                |
| Human: BJ SiPS-D<br>induced pluripotent stem cells<br>Dj1 KO #17  | This paper                       | RRID: N/A                |
| Oligonucleotides                                                  |                                  |                          |
| PARK7 _L166P<br>F ATGCATACCCGCCTC<br>CATTACGTTG                   | This paper                       | RRID: N/A                |
| PARK7 _L166P<br>R ATAAGCAGAGAAAAT<br>CACAAGCCTC                   | This paper                       | RRID: N/A                |
| PARK7 _L166P<br>seq AATGGATTCCTAA<br>CGGCCTG                      | This paper                       | RRID: N/A                |
| PARK7 R<br>ATGGCTAAAAATCGATGTG<br>G                               | This paper                       | RRID: N/A                |
| PARK7 F<br>TGGGGTATCTCAGGGTTG<br>CA                               | This paper                       | RRID: N/A                |
| Recombinant DNA                                                   |                                  |                          |
| Plasmid: pTAHR TH-<br>p2a-TD:Tomato (floxed<br>selection Puro)    | Ahfeldt et al., 2020;<br>Addgene | Cat#135814; RRID:<br>N/A |
| CRISPR 1: pTACR<br>TH1-p2aGFP                                     | Ahfeldt et al., 2020;<br>Addgene | Cat#135815; RRID:<br>N/A |

|                                                                                                                                                                     |                                                                                                |                                        |
|---------------------------------------------------------------------------------------------------------------------------------------------------------------------|------------------------------------------------------------------------------------------------|----------------------------------------|
| CRISPR 2: pTACR<br>TH2-p2aGFP                                                                                                                                       | Ahfeldt et al., 2020;<br>Addgene                                                               | Cat#135816; RRID:<br>N/A               |
| Plasmid: pCAG-<br>Cre:GFP                                                                                                                                           | Matsuda and Cepko,<br>2007; Addgene                                                            | Cat#13776; RRID:<br>Addgene_13776      |
| Software and<br>algorithms                                                                                                                                          |                                                                                                |                                        |
| CellProfiler                                                                                                                                                        | <a href="https://cellprofiler.org/">https://cellprofiler.org/</a>                              | RRID:SCR_007358                        |
| Rstudio                                                                                                                                                             | <a href="https://www.rstudio.com/">https://www.rstudio.co<br/>m/</a>                           | RRID:SCR_000432                        |
| Ingenuity Pathway<br>Analysis (IPA)                                                                                                                                 | Qiagen                                                                                         | RRID:SCR_008653                        |
| QuPath                                                                                                                                                              | <a href="https://QuPath.github.io/">https://QuPath.github.i<br/>o/</a>                         | RRID:SCR_018257                        |
| Pathfinder                                                                                                                                                          | <a href="https://github.com/egeulgen/pathfindR">https://github.com/ege<br/>ulgen/pathfindR</a> | Ulgen et al., 2019                     |
| PhosR R packages                                                                                                                                                    | <a href="https://github.com/PYangLab/PhosR">https://github.com/PYa<br/>ngLab/PhosR</a>         | Kim et al., 2021                       |
| MetaboAnalyst 4.0                                                                                                                                                   | <a href="https://www.metaboanalyst.ca">https://www.metaboan<br/>alyst.ca</a>                   | RRID:SCR_015539                        |
| Fiji                                                                                                                                                                | <a href="https://fiji.sc/">https://fiji.sc/</a>                                                | Chong et al., 2019;<br>RRID:SCR_002285 |
| Other                                                                                                                                                               |                                                                                                |                                        |
| 4D-<br>Nucleofector™ Core Unit                                                                                                                                      | Lonza                                                                                          | Cat#AAF-1002B;<br>RRID: N/A            |
| Cell Culture<br>Microplate, 96-well, PS, F-<br>bottom (Chimney Well),<br>μClear®, Black,<br>CELLCOAT®, Poly-L-Lysine,<br>Lid with Condensation Rings,<br>5 pcs./bag | Greiner                                                                                        | Cat#655936; RRID:<br>N/A               |
| Corning® 125 mL<br>Disposable Spinner Flask                                                                                                                         | Corning                                                                                        | Cat#3152; RRID:<br>N/A                 |

|                                                           |                         |                              |
|-----------------------------------------------------------|-------------------------|------------------------------|
| with 70 mm Top Cap and 2 Angled Sidearms, Sterile         |                         |                              |
| Corning® Costar® Ultra-Low Attachment Multiple Well Plate | MilliporeSigma          | Cat#CLS3471; RRID: N/A       |
| Countess™ Cell Counting Chamber Slides                    | Invitrogen              | Cat#C10228; RRID: SCR_019815 |
| Countess™ II FL Automated Cell Counter                    | Invitrogen              | Cat#AMQAF1000; RRID: N/A     |
| Falcon® Round-Bottom Tubes with Cell Strainer Cap, 5 mL   | STEMCELL Technologies   | Cat#100-0087; RRID: N/A      |
| Fisherbrand™ Disposable Borosilicate Glass Pasteur Pipets | Fisher Scientific       | Cat#13-678-20D; RRID: N/A    |
| Fisherbrand™ Sterile Cell Strainers (70 µm)               | Fisher Scientific       | Cat#22-363-548; RRID: N/A    |
| pluriStrainer® 300 µm, 25 pcs. – Sterile (Cell Strainer)  | pluriSelect             | Cat#43-50300-03; RRID: N/A   |
| pluriStrainer® 500 µm, 25 pcs. – Sterile (Cell Strainer)  | pluriSelect             | Cat#43-50500-03; RRID: N/A   |
| Stirrers, Magnetic, Nine-position, Dura-Mag               | Chemglass Life Sciences | Cat#CLS-4100-09; RRID: N/A   |
| Variable Speed 2D Rocker                                  | USA Scientific          | Cat#2527-2000; RRID: N/A     |

**Supplementary Table2.** List of reagents.

Exp1\_AO

4plex TMTpro  
proteomics  
dataset:

| Sample  | Channel | Clone                        | Cell type                                 | Lysate preparation |
|---------|---------|------------------------------|-------------------------------------------|--------------------|
| WT_1    | 132c    | KOLF 2.1J background         | Midbrain patterned astrocytes of 100 days | RIPA               |
| WT_2    | 133n    | KOLF 2.1J background         | Midbrain patterned astrocytes of 100 days | RIPA               |
| L166P_1 | 133c    | L166P-1/KOLF 2.1J background | Midbrain patterned astrocytes of 100 days | RIPA               |
| L166P_2 | 134n    | L166P-1/KOLF 2.1J background | Midbrain patterned astrocytes of 100 days | RIPA               |

| Source files | Experiment                   |
|--------------|------------------------------|
| KN043-066    | Total proteome (FAIMS-MS3)   |
| KN067-072    | Phospho proteome (FAIMS-MS2) |

Exp2\_AO

9plex TMT (FAIMS-hrMS2) proteomics  
dataset:

| Sample    | Channel | Clone                        | Cell type                                 | Lysate preparation |
|-----------|---------|------------------------------|-------------------------------------------|--------------------|
| WT_1      | 126     | KOLF 2.1J background         | Midbrain patterned astrocytes of 100 days | RIPA               |
| WT_2      | 127n    | KOLF 2.1J background         | Midbrain patterned astrocytes of 100 days | RIPA               |
| WT_3      | 127c    | KOLF 2.1J background         | Midbrain patterned astrocytes of 100 days | RIPA               |
| L166P_A_1 | 128n    | L166P-1/KOLF 2.1J background | Midbrain patterned astrocytes of 100 days | RIPA               |
| L166P_A_2 | 128c    | L166P-1/KOLF 2.1J background | Midbrain patterned astrocytes of 100 days | RIPA               |
| L166P_A_3 | 129n    | L166P-1/KOLF 2.1J background | Midbrain patterned astrocytes of 100 days | RIPA               |
| L166P_B_1 | 129c    | L166P-2/KOLF 2.1J background | Midbrain patterned astrocytes of 100 days | RIPA               |
| L166P_B_2 | 130n    | L166P-2/KOLF 2.1J background | Midbrain patterned astrocytes of 100 days | RIPA               |
| L166P_B_3 | 130c    | L166P-2/KOLF 2.1J background | Midbrain patterned astrocytes of 100 days | RIPA               |

| Source files | Experiment                |
|--------------|---------------------------|
| KN073-96     | Total proteome(FAIMS-MS2) |

**Supplementary Table3.** Metadata for the proteomics and phosphoproteomics experiments.
